# Supplementary material for: High density SNP mapping and QTL analysis for time of leaf budburst in Corylus avellana L
Source: PubMed Central journal article supplement (PMC5880404; doi:10.1371/journal.pone.0195408), 2018-04-02

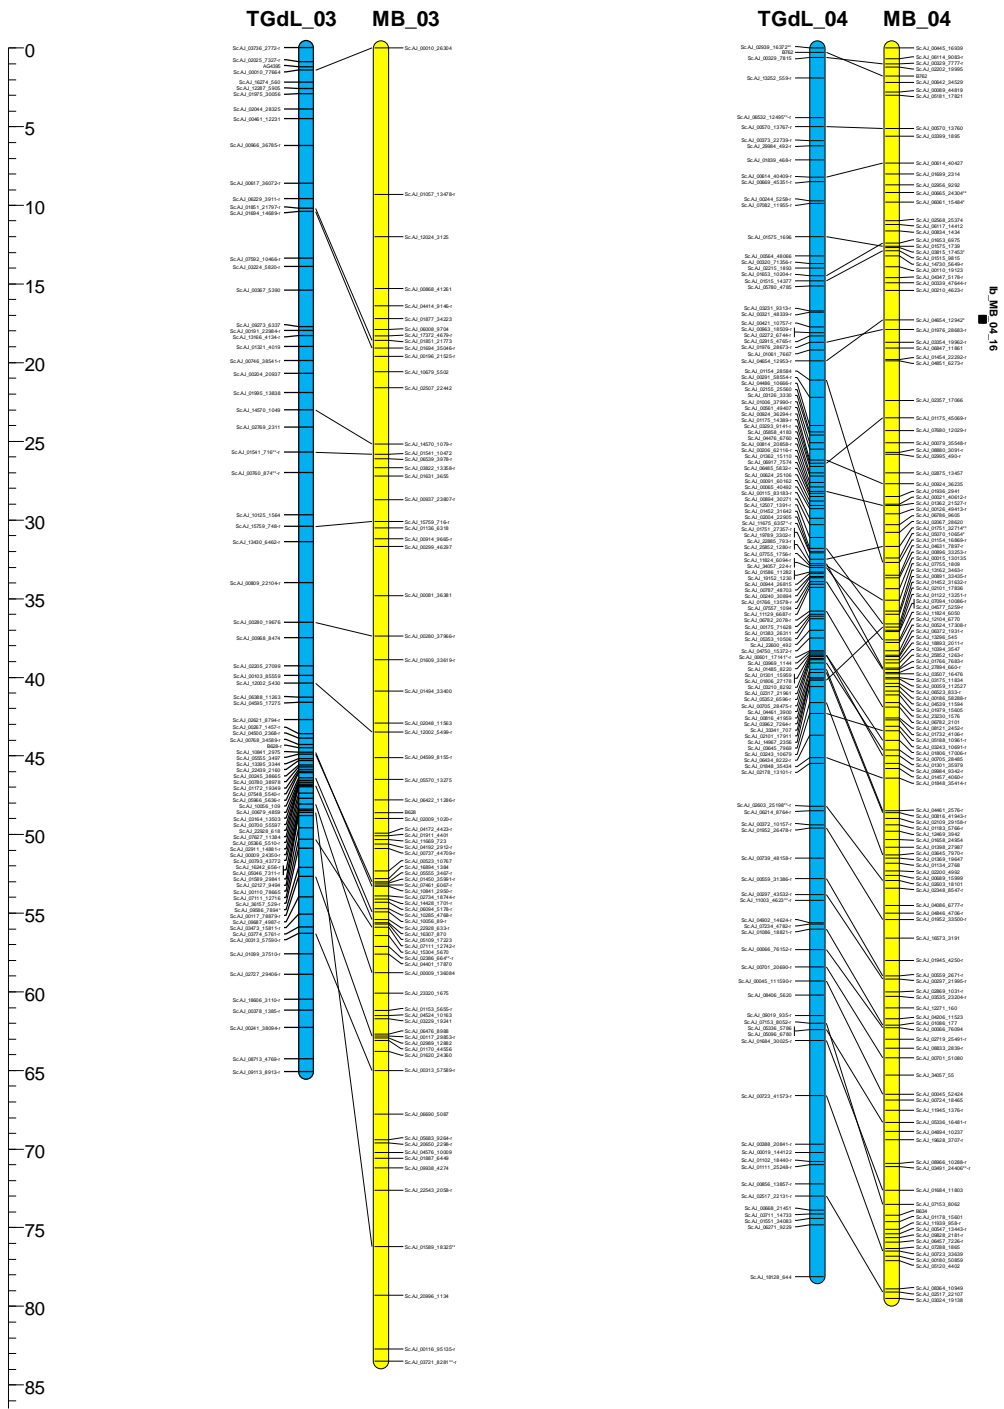

B 04 01 16

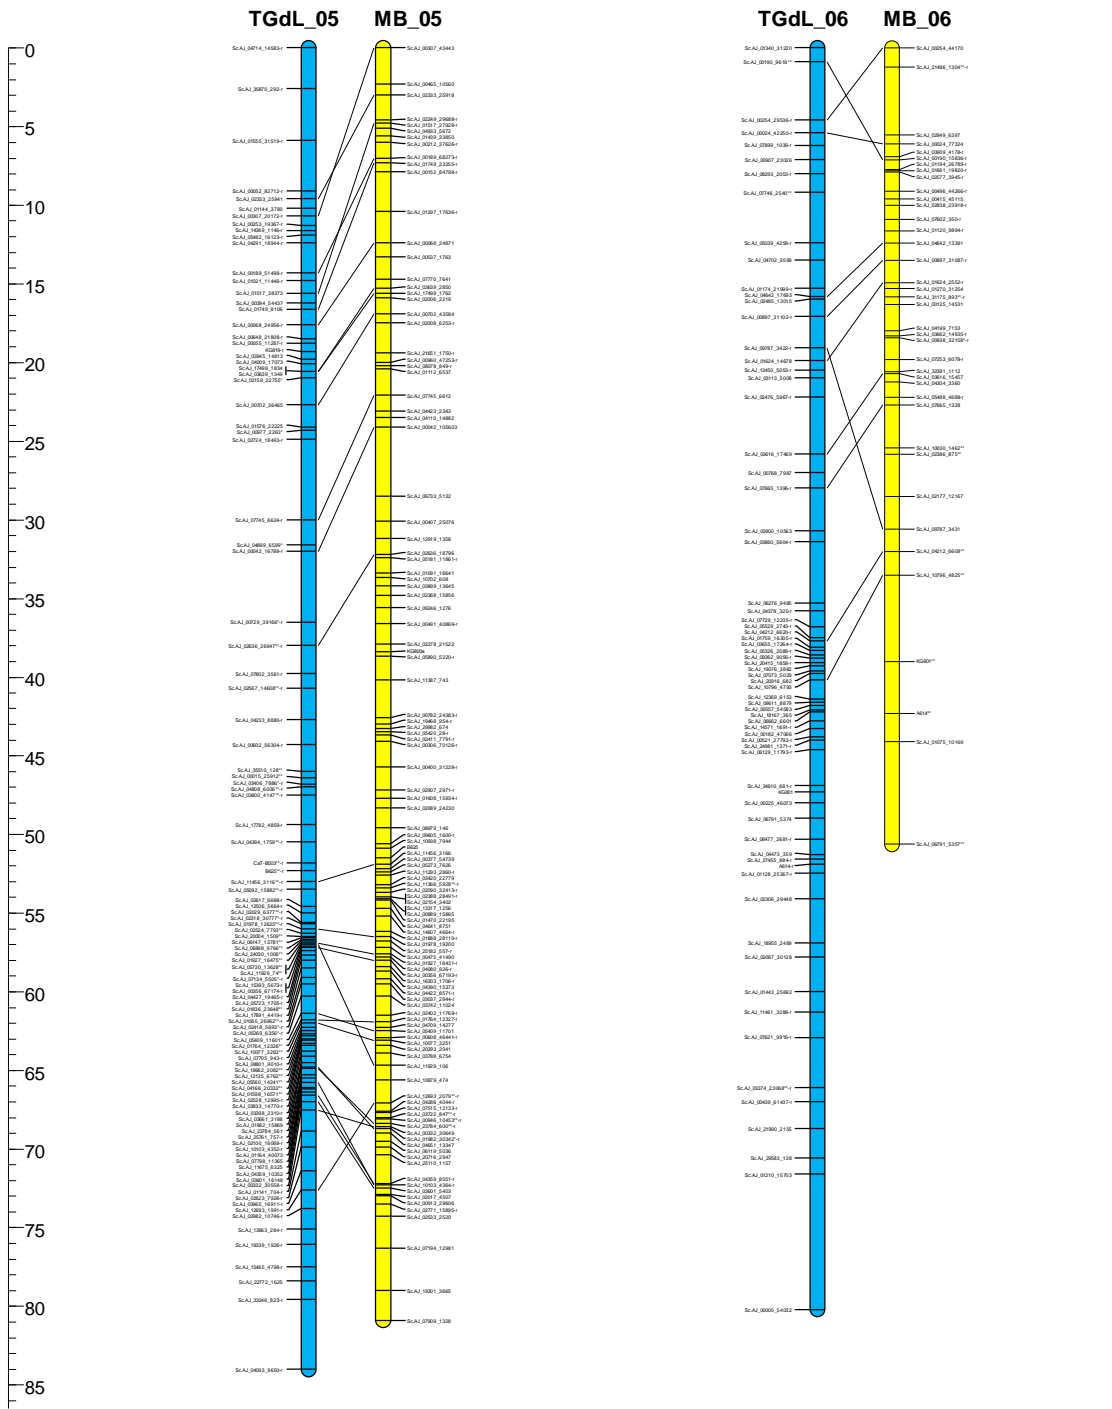



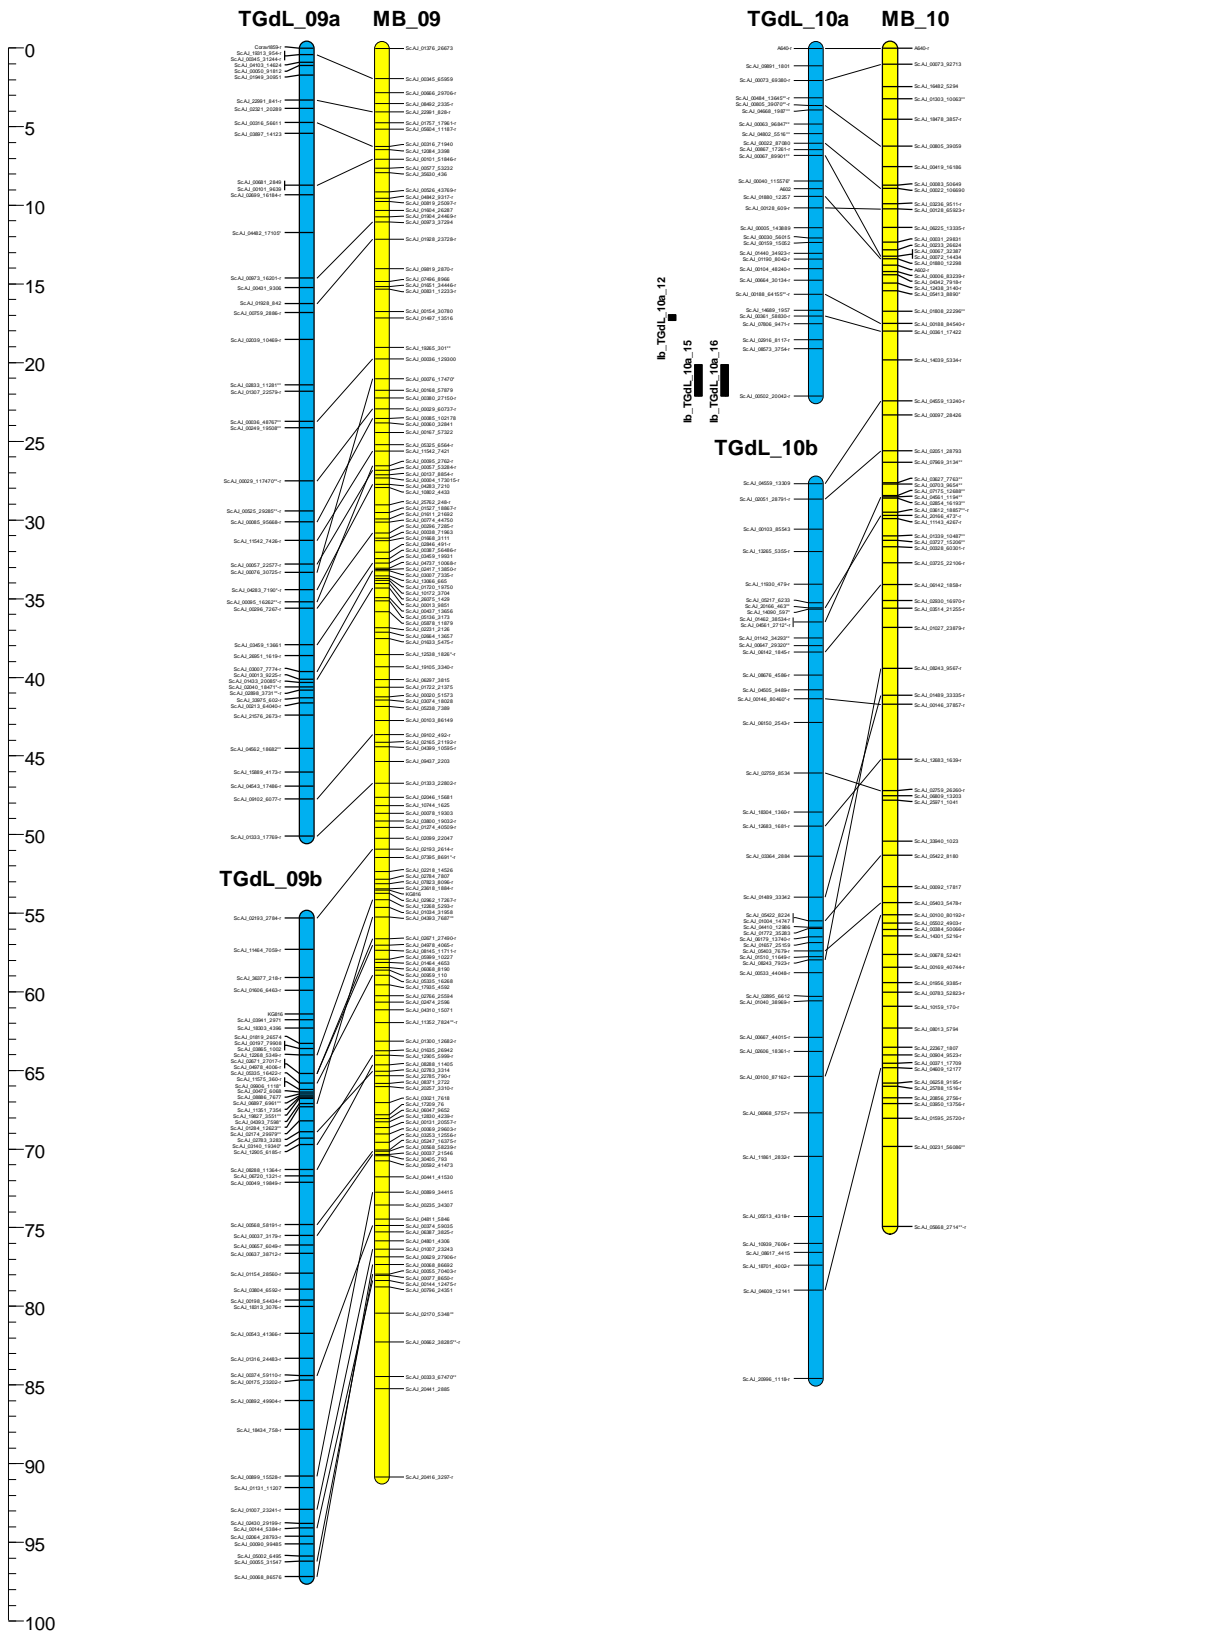

TGdL\_11 MB\_11

0  
5  
10  
15  
20  
25  
30  
35  
40  
45  
50  
55  
60  
65  
70  
75  
80

10 TGdL\_11 13

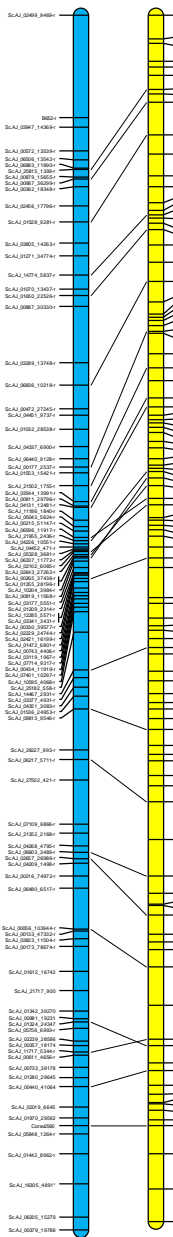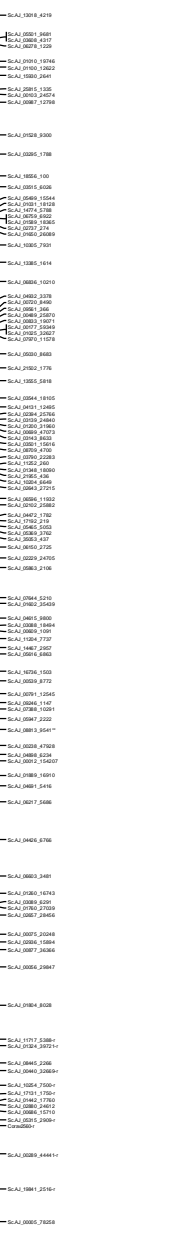

Supplement: pone.0195408.s003.pdf [file pone.0195408.s003.pdf]
